# Supplementary material for: An Examination of Potential Renal Toxicity from Low Dose Glyphosate Exposure in Human Subjects
Source: Research Square preprint supplement (doi:10.21203/rs.3.rs-7539235/v1), 2025-12-29
Supplement: Supplementary file 1 [file d365594dd65c5ffa3683d0b7.docx]

Supplementary information

An Examination of Potential Renal Toxicity from

Low Dose Glyphosate Exposure in Human Subjects

Stephen M. Roberts1, Nancy D. Denslow1, Danielle S. Nelson2, Juan G. Perez-Jimenez3,4,

J. Glenn Morris, Jr.4*

1 Department of Physiological Sciences and Center for Environmental and Human Toxicology, College of Veterinary Medicine, University of Florida, Gainesville, FL, 32611, USA

2. Department of Family and Community Medicine, College of Medicine, University of Florida, Gainesville, FL 32611, USA

3. Genetics Institute, University of Florida, Gainesville, FL 32610, USA

4. Emerging Pathogens Institute, University of Florida, Gainesville, FL 32610, USA

Corresponding author: Dr. J. Glenn Morris, Jr., Emerging Pathogens Institute, University of Florida, 2055 Mowry Road, Gainesville, FL 32610-0009

Email: [jgmorris@epi.ufl.edu](mailto:jgmorris@epi.ufl.edu)

Supplementary Figure S1

**Figure S1**: Glyphosate-biomarker relationship plots for 12 additional biomarkers not included in Figure 2.
